# Supplementary material
Source: PubMed Central journal article supplement (PMC3586970)
Supplement: CJN.06020612_CJN06020612SupplementaryData1.pdf [file CJN.06020612_CJN06020612SupplementaryData1.pdf]

Nisha Bansal,<sup>1</sup> Martin Keane,<sup>2</sup> Patrice Delafontaine,<sup>3</sup> Daniel Dries,<sup>4</sup> Elyse Foster,<sup>5</sup> Crystal A. Gadegbeku,<sup>6</sup> Alan S. Go,<sup>7,8</sup> L. Lee Hamm,<sup>3</sup> John W. Kusek,<sup>9</sup> Akinlolu O. Ojo,<sup>6</sup> Mahboob Rahman,<sup>10</sup> Kaixiang Tao,<sup>11</sup> Jackson T. Wright,<sup>10</sup> Dawei Xie,<sup>11</sup> and Chi-yuan Hsu<sup>1,8</sup> for the CRIC Study Investigators

<sup>1</sup>Department of Medicine/Division of Nephrology, University of California, San Francisco, California

<sup>2</sup>Department of Medicine/Cardiovascular Section, Hospital of the University of Pennsylvania, Philadelphia, Pennsylvania

<sup>3</sup>Tulane University School of Medicine, New Orleans, Louisiana

<sup>4</sup>Department of Medicine/Division of Cardiology, Yale School of Medicine, New Haven, Connecticut

<sup>5</sup>Department of Medicine/Division of Cardiology, University of California, San Francisco, California

<sup>6</sup>Department of Medicine/Division of Nephrology, University of Michigan Hospital, Ann Arbor, Michigan

<sup>7</sup>Department of Medicine, Biostatistics and Epidemiology, University of California, San Francisco, California

<sup>8</sup>Kaiser Permanente of Northern California Division of Research, Oakland, California

<sup>9</sup>National Institute of Diabetes and Digestive and Kidney Diseases, National Institutes of Health, Bethesda, Maryland

<sup>10</sup>Department of Medicine/Division of Nephrology, Case Western Reserve University School of Medicine, Cleveland, Ohio

<sup>11</sup>Center for Clinical Epidemiology and Biostatistics, Perelman School of Medicine, University of Pennsylvania, Philadelphia, Pennsylvania
