# Supplementary material
Source: PubMed Central journal article supplement (PMC3586970)
Supplement: CJN.06020612_CJN06020612SupplementaryData2.pdf [file CJN.06020612_CJN06020612SupplementaryData2.pdf]

**SUPPLEMENTAL TABLES**

**Supplemental Table 1. Characteristics of CRIC participants at advanced CKD (defined as eGFR < 20 ml/min/1.73 m<sup>2</sup>)**

| <b>Characteristic at advanced CKD</b>                                                                     | <b>No<br/>Echocardiogram<br/>(N=175)</b> | <b>Had<br/>Echocardiogram<br/>(N=638)</b> | <b>P<br/>value</b> |
|-----------------------------------------------------------------------------------------------------------|------------------------------------------|-------------------------------------------|--------------------|
| <b>Age, year<br/>Mean (SD)</b>                                                                            | 59.2 (12.3)                              | 59.0 (11.6)                               | 0.8                |
| <b>Female, %</b>                                                                                          | 41.7                                     | 49.5                                      | 0.07               |
| <b>Black, %</b>                                                                                           | 37.1                                     | 48.9                                      | 0.01               |
| <b>eGFR, ml/min/1.73 m<sup>2</sup><br/>Mean (SD)</b>                                                      | 17.7 (5.7)                               | 18.3 (4.6)                                | 0.2                |
| <b>Slope of eGFR from entry to<br/>advanced CKD, ml/min/1.73 m<sup>2</sup><br/>per year<br/>Mean (SD)</b> | -6.9 (5.0)                               | -6.5 (5.5)                                | 0.4                |
| <b>24H Urine Protein, grams/24 hour<br/>Mean (SD)</b>                                                     | 4.1 (4.5)                                | 2.9 (3.5)                                 | 0.003              |
| <b>Body Mass Index, kg/m<sup>2</sup><br/>Median (IQR)</b>                                                 | 31.2 (26.9, 37.3)                        | 31.9 (26.6, 37.1)                         | 0.6                |
| <b>Hemoglobin, g/dL<br/>Mean (SD)</b>                                                                     | 10.9 (1.6)                               | 11.3 (1.6)                                | 0.0004             |
| <b>Systolic blood pressure, mmHg<br/>Mean (SD)</b>                                                        | 140.9 (28.1)                             | 136.9 (25.1)                              | 0.07               |
| <b>Diastolic blood pressure, mmHg<br/>Mean (SD)</b>                                                       | 71.1 (15.0)                              | 70.4 (12.9)                               | 0.6                |
| <b>Ace inhibitor or ARB use, %</b>                                                                        | 56.5                                     | 63.6                                      | 0.09               |
| <b>Hypertension, %</b>                                                                                    | 96.0                                     | 97.0                                      | 0.5                |
| <b>Diabetes, %</b>                                                                                        | 64.0                                     | 62.9                                      | 0.8                |
| <b>Cardiovascular Disease, %</b>                                                                          | 45.7                                     | 45.5                                      | 1.0                |

| <b>Characteristic at advanced CKD</b>                       | <b>No<br/>Echocardiogram<br/>(N=175)</b> | <b>Had<br/>Echocardiogram<br/>(N=638)</b> | <b>P<br/>value</b> |
|-------------------------------------------------------------|------------------------------------------|-------------------------------------------|--------------------|
| <b>Peripheral Vascular Disease, %</b>                       | 15.4                                     | 11.4                                      | 0.2                |
| <b>Congestive Heart Failure, %</b>                          | 18.3                                     | 15.4                                      | 0.3                |
| <b>Stoke, %</b>                                             | 12.6                                     | 13.0                                      | 0.9                |
| <b>Myocardial Infarction/Prior<br/>Revascularization, %</b> | 28.6                                     | 26.8                                      | 0.6                |
| <b>High Cholesterol, %</b>                                  | 94.3                                     | 95.0                                      | 0.7                |
| <b>Current Smoker, %</b>                                    | 13.1                                     | 13.6                                      | 0.9                |
| <b>Alcohol Use, %</b>                                       | 46.5                                     | 47.2                                      | 0.9                |

**Supplemental Table 2. Characteristics of CRIC participants at ESRD**

| <b>Characteristic at ESRD</b>                                                                             | <b>No<br/>Echocardiogram<br/>(N=97)</b> | <b>Had<br/>echocardiogram<br/>(N=218)</b> | <b>P<br/>value</b> |
|-----------------------------------------------------------------------------------------------------------|-----------------------------------------|-------------------------------------------|--------------------|
| <b>Age, year<br/>Mean (SD)</b>                                                                            | 59.2 (11.4)                             | 56.0 (12.1)                               | 0.03               |
| <b>Female, %</b>                                                                                          | 42.3                                    | 46.3                                      | 0.5                |
| <b>Black, %</b>                                                                                           | 38.1                                    | 61.9                                      | <.0001             |
| <b>eGFR, ml/min/1.73 m<sup>2</sup><br/>Mean (SD)</b>                                                      | 16.7 (3.5)                              | 16.9 (3.5)                                | 0.6                |
| <b>Slope of eGFR from entry to<br/>advanced CKD, ml/min/1.73 m<sup>2</sup><br/>per year<br/>Mean (SD)</b> | -7.6 (5.7)                              | -8.6 (5.8)                                | 0.2                |
| <b>24H Urine Protein, grams/24<br/>hour<br/>Mean (SD)</b>                                                 | 3.7 (3.7)                               | 4.0 (4.1)                                 | 0.5                |

| <b>Characteristic at ESRD</b>                               | <b>No<br/>Echocardiogram<br/>(N=97)</b> | <b>Had<br/>echocardiogram<br/>(N=218)</b> | <b>P<br/>value</b> |
|-------------------------------------------------------------|-----------------------------------------|-------------------------------------------|--------------------|
| <b>Body Mass Index, kg/m<sup>2</sup><br/>Median (IQR)</b>   | 29.1 (25.9, 34.2)                       | 31.5 (26.6, 36.6)                         | 0.005              |
| <b>Hemoglobin, g/dL<br/>Mean (SD)</b>                       | 11.0 (1.6)                              | 11.2 (1.6)                                | 0.3                |
| <b>Systolic blood pressure, mmHg<br/>Mean (SD)</b>          | 145.5 (27.8)                            | 141.0 (26.2)                              | 0.2                |
| <b>Diastolic blood pressure, mmHg<br/>Mean (SD)</b>         | 72.8 (13.3)                             | 72.6 (12.9)                               | 0.9                |
| <b>Ace inhibitor or ARB use, %</b>                          | 58.9                                    | 64.4                                      | 0.4                |
| <b>Hypertension, %</b>                                      | 97.9                                    | 98.6                                      | 0.6                |
| <b>Diabetes, %</b>                                          | 66.0                                    | 64.2                                      | 0.8                |
| <b>Cardiovascular Disease, %</b>                            | 46.4                                    | 46.3                                      | 1.0                |
| <b>Peripheral Vascular Disease, %</b>                       | 13.4                                    | 8.3                                       | 0.2                |
| <b>Congestive Heart Failure, %</b>                          | 17.5                                    | 14.2                                      | 0.5                |
| <b>Stoke, %</b>                                             | 16.5                                    | 12.8                                      | 0.4                |
| <b>Myocardial Infarction/Prior<br/>Revascularization, %</b> | 27.8                                    | 23.4                                      | 0.4                |
| <b>High Cholesterol, %</b>                                  | 95.9                                    | 94.5                                      | 0.6                |
| <b>Current Smoker, %</b>                                    | 4.1                                     | 5.5                                       |                    |
| <b>Alcohol Use, %</b>                                       | 18.6                                    | 11.5                                      | 0.09               |
| <b>Diabetes, %</b>                                          | 43.3                                    | 50.7                                      | 0.2                |
